# Supplementary material
Source: PubMed Central journal article supplement (PMC4086655)
Supplement: Supp_Figure1.pdf [file Supp_Figure1.pdf]

## Supplementary Data

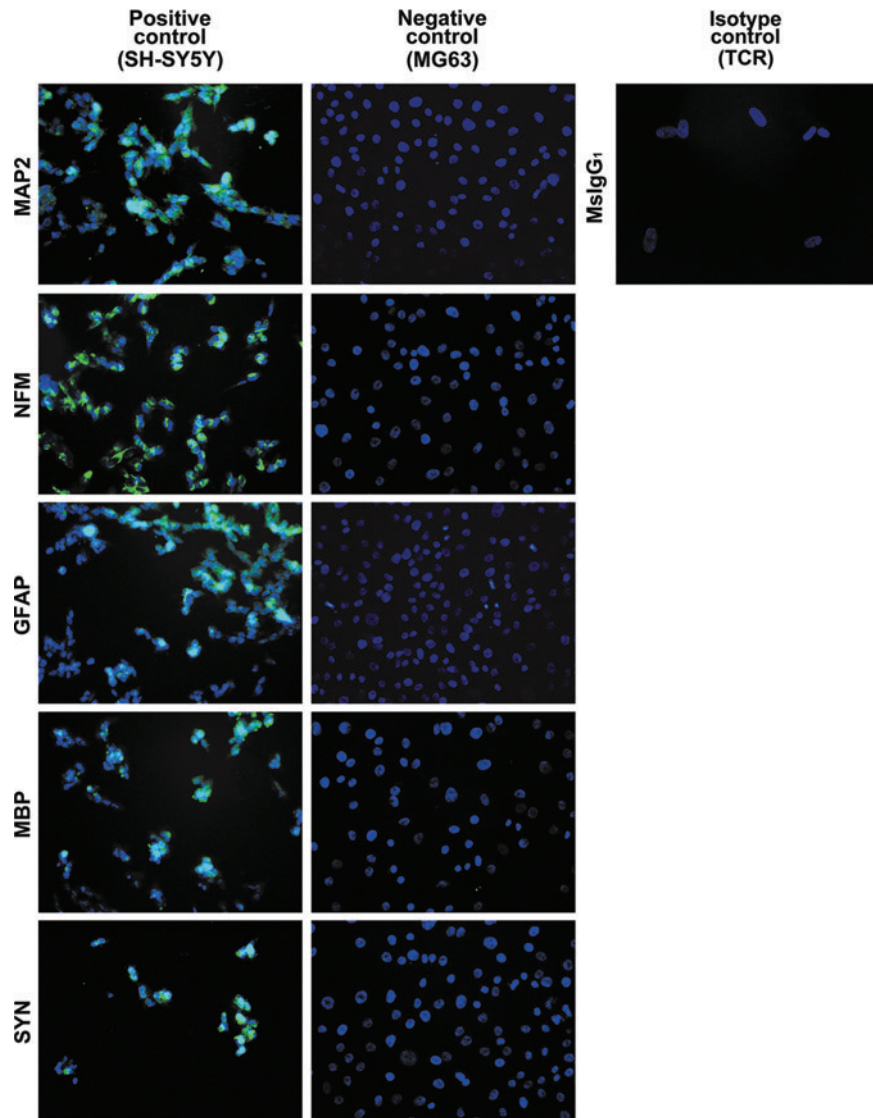

**SUPPLEMENTARY FIG. S1.** Controls of immunocytochemistry. GFAP, glial fibrillary acidic protein; MBP, myelin basic protein.
